# Supplementary material for: Erratum to: Imageability and body–object interaction ratings for 599 multisyllabic nouns
Source: Springer Nature journal article supplement (doi:10.3758/s13428-012-0288-8), 2012-12-17
Supplement: MOESM1 [file 13428_2012_288_MOESM1_ESM.xls]

## Sheet: imageability_BOI_ratings
Imageability and Body-Object Interaction Ratings
column variables and their descriptions
item = the item that was rated
num = the number of participants ratings used to compute the statistics for the item
rating = mean body-object interaction rating
sd_rating = the standard deviation for the body-object interaction ratings
Words selected from the INPN database are in bold font
Words selected from the N-Watch database are in regular font
	Imageability Ratings				Body-Object Interaction Ratings
item	num	rating	sd_rating		num	rating	sd_rating
accordion	58	5.47	2.07		27	5	1.24035
acorn	59	5.92	1.51		27	3.44	1.76141
airplane	59	6.58	0.81		27	2.81	1.46857
alligator	57	6.39	1.33		27	1.85	1.06351
anchor	58	6.09	1.39		27	2.81	1.14479
antlers	59	5.75	1.56		27	2.26	1.19591
anvil	58	4.57	2.41		27	2.41	1.39392
apple	57	6.53	1.05		27	5.26	1.81007
arrow	59	5.88	1.52		27	4	1.83973
artichoke	59	4.56	2.06		27	4.07	2.11089
ashtray	58	5.76	1.59		27	4.04	1.87045
asparagus	56	5.84	1.85		27	4.44	1.98714
baby	57	6.46	1.15		27	5.59	1.47438
backpack	59	6.25	1.24		27	5.33	1.38675
balcony	56	5.82	1.59		27	3.33	1.83973
balloon	57	6.23	1.32		27	5.22	1.62512
banana	57	6.37	1.25		27	4.89	1.9282
band-aid	59	6.33	1.18		27	5.48	1.18874
banjo	57	5.49	1.77		27	5.7	1.2954
barbecue	56	5.98	1.42		27	4.85	1.53682
barrel	57	5.63	1.75		27	3.67	1.61722
basket	57	6.09	1.35		27	5.07	1.63909
bathtub	59	6.27	1.14		27	5.26	1.72298
beaver	57	6.25	1.34		27	1.7	0.91209
bicycle	57	6.54	0.8		27	6.33	0.877058
binoculars	58	6.05	1.49		27	5	1.68705
bottle	57	6.02	1.45		27	5.59	1.42125
bucket	57	6.14	1.41		27	5.11	1.25064
butter	57	6.05	1.54		27	4	2.14834
butterfly	59	6.32	1.17		27	2.52	1.34079
button	59	6.07	1.53		27	4.96	1.7205
cactus	55	6.16	1.48		27	3.07	1.95971
camel	59	6.31	1.1		27	2.52	1.25178
camera	57	6.42	1		27	5.48	1.451
can opener	58	5.86	1.42		27	5.85	1.26198
candle	56	6.36	1.1		27	4.37	1.66752
cannon	59	5.71	1.62		27	2.59	1.18514
canoe	59	6.15	1.17		27	4.78	1.45002
carousel	57	5.65	1.93		27	3.85	1.63387
carrot	57	6.33	1.27		27	4.63	1.82184
castle	57	6.16	1.3		27	2	1.24035
celery	57	6.04	1.56		27	4.44	2.08167
cherry	58	6.36	1.22		27	4.89	1.9282
chicken	57	6.3	1.31		27	3.67	1.6641
chimney	57	6	1.6		27	2.04	1.09128
cigarette	57	6.21	1.37		27	5.56	1.5525
city	59	5.64	1.61		27	2.3	1.68283
closet	57	5.56	1.76		27	2.96	1.62863
clothespin	56	5.29	2.03		27	4.89	1.57708
cookie	59	6.56	0.82		27	5.15	1.56165
corkscrew	59	5.61	1.59		27	5.15	1.37851
cowboy	59	6.29	1.16		27	2.59	1.67008
crackers	57	5.68	1.83		27	5.15	1.68029
curtains	57	5.81	1.61		27	4.63	1.47148
dentist	57	6.09	1.3		27	3.63	1.84283
desert	56	5.82	1.56		27	2.52	1.50308
diaper	57	5.96	1.59		27	4.89	1.62512
dinosaur	57	6.44	1.18		27	1.07	0.26688
doctor	59	6.22	1.1		27	3.37	1.75736
dolphin	58	6.47	0.88		27	2.48	1.451
donkey	59	6.42	0.97		27	2.59	1.08342
dragon	57	6.21	1.52		27	1	0
drawer	57	5.58	1.69		27	4.33	1.77591
dresser	57	5.84	1.72		27	4.41	1.64689
dustpan	57	5.74	1.74		27	4.93	1.68537
eagle	57	6.63	0.79		27	1.7	0.953327
earring	59	6.1	1.41		27	5.41	1.64689
elephant	57	6.6	0.78		27	1.93	1.035
envelope	57	6.14	1.3		27	5.26	1.43024
eskimo	59	5.8	1.67		27	2.44	1.1209
faucet	59	6.03	1.52		27	4.81	1.73287
feather	57	6.26	1.26		27	4.04	1.62863
finger	59	6.24	1.44		27	5.93	1.87956
fire	59	6.31	1.29		27	2.33	1.64083
fire hydrant	59	6	1.73		27	3.22	1.76141
fire truck	57	6.44	1.13		27	2.85	1.32153
fireman	57	6.37	1.08		27	3.15	1.48593
fish tank	57	6.11	1.35		27	3.63	1.27545
fishing pole	57	6.05	1.48		27	5.44	1.39596
flashlight	58	6.31	1.25		27	5.37	1.21365
flower	59	6.44	0.95		27	4.33	1.64083
football	59	6.22	1.25		27	5.48	1.08735
fountain	57	6	1.59		27	3.3	1.4888
funnel	58	5.65	1.72		27	4.33	1.68705
genie	58	5.67	1.73		27	1.07	0.26688
giraffe	57	6.47	1.12		27	1.81	0.833761
glasses	59	6.34	1.15		27	5.11	1.39596
gorilla	57	6.49	1.1		27	1.78	0.9337
grasshopper	59	6.14	1.21		27	2.81	1.35978
guitar	59	6.49	0.82		27	6.07	0.997147
hamburger	59	6.47	1.02		27	5.3	1.5396
hammer	58	6.31	1.13		27	5.37	1.3344
hammock	59	6.2	1.24		27	5.19	1.41522
handcuffs	57	6.3	1.25		27	5.11	1.42325
hanger	59	5.71	1.62		27	4.85	1.61015
helicopter	58	6.34	1.18		27	3.15	1.61015
helmet	57	6.11	1.53		27	5.26	1.50876
high chair	57	6.04	1.38		27	5.41	1.11835
hippo	57	6.3	1.36		27	1.81	1.03912
ice cream cone	59	6.39	1.1		27	5.19	1.56984
igloo	59	6.31	1.19		27	2.26	0.944319
iron	57	5.54	1.81		27	4.19	1.6879
ironing board	59	5.83	1.5		27	5.04	1.28547
jacket	57	6.07	1.43		27	5.93	1.10683
jump rope	56	5.75	1.83		27	5.07	1.4122
kangaroo	57	6.51	0.93		27	2.07	1.10683
ladder	57	6.05	1.63		27	5.07	1.35663
ladle	58	4.88	2.08		27	5.04	1.62863
ladybug	57	6.47	1.07		27	3.44	1.82574
lawn mower	59	6.19	1.07		27	5.11	1.47631
lemon	59	6.49	0.99		27	4.63	1.54791
leopard	56	6.23	1.32		27	1.96	1.22416
letter	57	5.61	1.9		27	4.33	2.05688
lettuce	58	6.34	1.16		27	4.48	1.92894
light switch	58	5.95	1.5		27	5.07	1.7743
lightbulb	58	6.48	0.9		27	4.26	1.7887
lighthouse	57	6.3	1.16		27	2.19	1.49453
lightning	58	6.26	1.12		27	1.15	0.362014
lion	57	6.67	0.81		27	1.93	1.17427
lipstick	59	6.22	1.39		27	5.7	1.26536
lizard	57	6.26	1.29		27	2.3	1.17063
llama	57	5.84	1.66		27	2.15	0.988538
lobster	57	6.37	1.33		27	3.3	1.63648
magnet	59	5.61	1.66		27	3.93	1.70803
mailbox	58	6.05	1.36		27	4.19	1.98139
medal	57	5.96	1.5		27	3.33	1.68705
microphone	57	6.07	1.49		27	4.96	1.76464
microscope	58	6.03	1.4		27	4.7	1.3816
mirror	58	5.9	1.56		27	3.74	1.72298
mixer	59	4.95	2		27	4.67	1.59326
monkey	57	6.39	1.06		27	2.56	1.05003
mosquito	57	5.95	1.49		27	3.26	1.89316
motorcycle	57	6.42	1.19		27	5.33	1.1094
mountain	56	6.43	1.04		27	2.3	1.51441
mousetrap	57	5.91	1.57		27	3.93	1.70803
mushroom	59	6.42	1.05		27	4.44	1.90815
music	57	4.46	1.9		27	2.22	1.78311
necklace	59	6.03	1.27		27	5.19	1.81949
needle	57	6.04	1.43		27	5.04	1.55617
octopus	57	6.47	1		27	1.96	1.42725
onion	59	6.27	1.16		27	4.63	1.75736
orange	58	6.28	1.27		27	5.15	1.76948
ostrich	59	6.12	1.26		27	1.81	0.878681
package	56	5.55	1.55		27	4.41	1.67008
paintbrush	59	6.08	1.47		27	5.59	1.57527
palm tree	57	6.38	1.32		27	2.3	1.10296
panda	57	6.49	1.05		27	1.96	1.15962
paper	57	5.7	1.77		27	5.93	1.10683
paper clip	59	6.15	1.37		27	5.33	1.59326
parachute	56	5.93	1.63		27	3.96	1.40004
parrot	57	6.35	1.29		27	2.67	1.41421
peacock	59	6.25	1.24		27	1.85	0.907393
peanut	59	5.98	1.27		27	4.56	1.60128
pelican	59	5.47	1.96		27	2.15	1.19948
pencil	56	6.38	1.29		27	5.96	1.37229
penguin	59	6.44	1.04		27	1.89	1.05003
piano	59	6.47	0.9		27	5.89	1.1547
picture	57	5.33	1.88		27	3.89	1.80455
piggybank	57	6.32	1.34		27	3.93	1.66239
pillar	59	5.29	1.81		27	2.52	1.626
pillow	57	6.46	0.96		27	5.78	1.36814
pineapple	59	6.49	0.82		27	4.44	1.76141
pinecone	57	5.93	1.59		27	3.41	1.71552
pirate	57	6.21	1.25		27	1.96	1.09128
pitcher	57	5.51	1.78		27	5.22	1.5525
pitchfork	57	5.89	1.57		27	4.7	1.56438
pizza	59	6.59	0.91		27	5.04	1.80771
pliers	57	5.25	2.07		27	5.22	1.57708
policeman	57	6.18	1.31		27	2.93	1.2987
popcorn	59	6.54	0.86		27	5.41	1.75979
popsicle	57	6.16	1.41		27	4.89	1.60128
porcupine	59	6.12	1.26		27	2	1.56893
potato	57	6.23	1.35		27	4.93	1.83818
present	57	4.74	2.2		27	3.93	1.87956
pumpkin	57	6.39	1.22		27	4.81	1.56984
puzzle	57	5.96	1.41		27	5.44	1.42325
pyramid	56	6.48	1.11		27	1.85	0.7698
rabbit	57	6.53	1.04		27	3.07	1.66239
raccoon	56	6.39	1.27		27	1.93	1.035
radio	59	6.1	1.42		27	4.04	1.55617
radish	57	5.77	1.56		27	4.67	1.81871
railroad tracks	59	6.25	1.09		27	2.37	1.27545
rainbow	56	6.52	1.14		27	1	0
razor	58	6.1	1.29		27	5.15	1.45981
record player	57	5.63	1.85		27	4.67	1.6641
refrigerator	59	6.27	1.3		27	4.48	1.71801
rhinoceros	59	6.19	1.22		27	1.7	0.868899
robot	59	5.98	1.68		27	2.67	1.27098
rocket	57	6.16	1.29		27	1.96	1.12597
rocking chair	59	6.25	1.23		27	6.07	0.957799
roller skate	59	5.98	1.46		27	5.04	1.37229
rolling pin	59	5.53	2.01		27	5.15	1.23113
rooster	57	6.23	1.2		27	2	0.919866
ruler	57	5.81	1.71		27	5.26	1.53404
saddle	57	5.74	1.52		27	4.7	1.63648
safety pin	59	5.97	1.34		27	4.93	1.79585
sailboat	59	6.27	1.08		27	3.85	1.32153
sailor	59	5.64	1.65		27	2.81	1.71053
sandwich	57	6.33	1.06		27	5.11	1.78311
saxophone	59	6.03	1.54		27	5.7	1.26536
scissors	59	6.17	1.34		27	5.48	1.25178
scorpion	56	6.25	1.15		27	1.78	0.847319
screwdriver	57	6.14	1.42		27	5.44	1.33973
seahorse	57	6.25	1.33		27	1.63	0.741524
seesaw	59	6.08	1.42		27	4.56	1.5525
shoulder	57	5.91	1.67		27	4.78	2.10006
shovel	59	6.15	1.19		27	5.41	1.2788
shower	58	5.71	1.6		27	4.33	1.86052
skateboard	59	6.25	1.18		27	5.48	1.25178
skeleton	59	6.36	0.91		27	2.26	1.34715
slingshot	59	5.88	1.65		27	4.85	1.48593
slipper	57	5.86	1.64		27	5.56	1.31071
snowman	58	6.53	0.96		27	4.11	1.52753
soldier	57	6.05	1.53		27	2.7	1.20304
spaghetti	59	6.46	1		27	4.96	1.82886
spatula	59	6.02	1.54		27	5.48	1.47727
spider	57	6.32	1.15		27	2.74	1.40309
spider web	59	6.32	1.12		27	3.07	1.35663
squirrel	57	6.37	1.23		27	1.96	1.25519
statue	57	5.63	1.79		27	2.44	1.45002
steering wheel	59	6.32	1.06		27	5.63	1.4451
stethoscope	57	5.89	1.59		27	5.26	1.25859
stocking	59	5.8	1.76		27	4.63	1.64429
stop light	58	6.24	1.3		27	1.59	1.11835
strawberry	57	6.47	1.02		27	4.81	1.94218
stroller	57	5.93	1.58		27	5.78	0.9337
submarine	58	6.02	1.52		27	1.85	0.818239
suitcase	58	6.33	1.26		27	4.7	1.35348
sweater	57	6.05	1.61		27	5.74	1.25859
table	59	6.15	1.28		27	5.04	1.25519
tape recorder	57	5.19	1.98		27	4.96	1.58069
teapot	57	6.12	1.36		27	5.19	1.35978
teepee	57	5.54	1.93		27	2.81	1.44214
telephone	57	6.35	1.13		27	5.93	1.14105
telescope	59	6.08	1.36		27	5	1.20894
television	59	6.63	0.81		27	4.15	1.63387
tennis racket	58	6.34	1.18		27	5.59	1.18514
thermos	59	5.54	1.76		27	5.37	1.47148
thimble	57	4.77	2.11		27	4.7	1.6128
tiger	59	6.54	0.88		27	1.67	0.784465
tire	57	6.19	1.44		27	4	1.24035
toaster	56	6.46	1.06		27	5	1.64083
toilet	59	6.31	1.28		27	5.74	1.28879
tomato	59	6.39	1.17		27	5.04	1.7863
toothbrush	57	6.33	1.24		27	6.22	0.9337
towel	57	5.98	1.46		27	6.22	1.01274
tractor	58	6.02	1.44		27	4.22	1.05003
trashcan	57	6.14	1.47		27	4.85	1.56165
tripod	59	5.2	1.74		27	4	1.79743
trophy	59	6.27	1.1		27	3.41	1.5995
trumpet	59	6.59	0.72		27	5.44	1.47631
turkey	57	6.3	1.32		27	3.19	1.21012
turtle	59	6.54	0.9		27	2.93	1.46566
tweezers	59	6.02	1.44		27	5.19	1.14479
typewriter	57	6	1.43		27	5.59	1.21716
umbrella	57	6.28	1.33		27	5.26	1.43024
unicorn	58	6.29	1.36		27	1.04	0.19245
unicycle	59	5.9	1.34		27	4.89	1.33973
vacuum	57	5.88	1.84		27	5.52	1.15593
violin	59	6.53	0.88		27	5.85	1.26198
volcano	59	6.14	1.43		27	1.33	0.5547
waffle	57	6.4	1.15		27	4.56	1.9282
wagon	59	6	1.49		27	4.67	1.27098
waiter	57	5.77	1.45		27	2.89	1.78311
wallet	59	6.05	1.46		27	5.15	1.70302
walnut	58	5.69	1.6		27	4.67	1.75412
walrus	58	5.95	1.62		27	1.78	0.697982
watering can	58	6.16	1.32		27	5.19	1.44214
watermelon	57	6.4	1.13		27	5	1.64083
wheelbarrow	56	5.8	1.75		27	5.3	1.23459
wheelchair	59	6.15	1.17		27	6.19	1.17791
whistle	57	5.81	1.72		27	4.96	1.76464
windmill	57	6.18	1.38		27	2.07	0.997147
window	58	6.17	1.31		27	3.52	1.626
woman	57	6.05	1.33		27	5.04	1.84977
yo-yo	59	6.22	1.38		27	5.96	0.979854
zebra	57	6.58	0.75		27	1.7	0.868899
zipper	59	6.12	1.4		27	5.04	1.7205
airport	43	5.35	1.36		41	3.76	1.72
alcohol	43	5.07	1.7		41	5.41	1.55
alley	43	4.7	1.78		41	3.22	1.64
altar	42	4.52	1.88		40	3.93	1.9
ambulance	41	6.54	1.12		41	3.37	1.61
apartment	43	4.79	1.8		40	4.38	1.44
apricot	41	5.93	1.78		41	5.15	1.75
apron	41	5.92	1.66		41	4.83	1.55
avocado	43	5.44	1.67		41	5.21	1.54
bacon	39	6.38	1.39		41	5.19	1.66
baggage	43	4.86	1.75		41	4.66	1.68
bagpipe	40	5.82	1.75		41	4.58	1.95
bandage	41	6.22	1.46		41	4.78	1.93
banner	43	4.65	1.74		41	3.49	1.8
basement	43	4.91	1.7		41	3.29	1.76
basin	41	4.43	2.19		41	4.19	1.79
baton	41	5.24	2.08		41	4.34	1.9
bayonet	41	4.24	2.54		41	3.83	2.07
bazooka	40	5.33	2.16		41	4.27	1.88
beaker	40	5.78	1.78		41	4.39	1.87
bedroom	43	5.47	1.76		41	4.22	1.84
biscuit	43	4.77	1.73		41	5.24	1.7
blanket	43	5.51	1.65		41	5.78	1.54
blender	43	5.47	1.75		41	4.34	1.89
blueberry	41	6.32	1.21		41	5.29	1.57
bookcase	43	5.14	1.77		41	4	1.83
bouquet	39	6.31	1.28		41	4.34	1.9
bracelet	42	5.38	1.54		41	4.85	1.71
broccoli	41	6.22	1.49		41	5.17	1.72
buggy	43	4.09	1.84		41	4.31	1.65
building	43	4.95	1.72		41	3.88	1.93
bullet	43	5.21	1.85		41	3.82	2.08
bungalow	41	5.27	2.03		40	3.13	1.59
bureau	40	3.3	1.86		40	3.4	1.82
cabbage	43	5	1.72		40	5.13	1.74
cabin	43	5.56	1.52		41	4.02	1.8
cabinet	40	6.1	1.43		41	4.1	1.89
camisole	41	4.98	2.49		41	4.61	1.99
canon	41	6.05	1.34		41	3.66	1.96
cantaloupe	41	6.1	1.53		41	5.02	1.82
canyon	41	5.87	1.69		41	3.05	1.9
carpet	43	5.02	1.91		41	4.51	1.85
carriage	43	4.39	1.85		41	4.05	1.83
cathedral	41	5.76	1.88		41	3.46	1.53
cauliflower	41	6.29	1.33		41	5.31	1.62
cellar	43	4.39	1.75		40	3.25	1.51
cello	41	4.88	2.48		41	5.05	1.79
certificate	41	5.82	1.69		41	3.31	1.94
chandelier	41	6.27	1.37		41	3.07	1.94
chapel	41	5.73	1.87		41	3.49	1.55
chisel	41	5.17	2.04		41	4.22	2.02
chocolate	41	5.63	1.65		41	5.49	1.42
cigar	41	6.12	1.33		41	5.41	1.34
clarinet	41	5.66	2.09		41	5.12	1.73
cleaver	41	4.17	2.05		41	4.15	1.96
coconut	41	6.46	1.07		41	5.14	1.65
coffin	41	6.1	1.51		41	3.83	1.95
colander	41	3.73	2.5		41	4	1.96
compass	43	5.3	1.6		41	4.66	1.93
contract	43	3.65	1.99		41	3.07	1.78
corner	40	5.34	1.93		41	2.8	1.64
corridor	41	4.83	2.31		41	3.07	1.82
costume	41	5.83	1.5		41	4.88	1.66
cottage	42	5.26	1.48		41	3.98	1.54
cradle	43	5	1.8		41	4.9	1.84
cranberry	41	6.34	1.37		41	5.26	1.69
crayon	41	6.39	1.28		41	5.02	2.09
crossbow	40	5.58	2.02		41	4.66	1.82
crowbar	41	5.59	1.92		41	4.56	1.83
crystal	42	5.02	1.46		40	3.7	1.9
cucumber	41	6.17	1.53		40	4.98	1.85
cupboard	41	6.14	1.41		41	4.02	1.82
cushion	43	5.04	1.6		41	4.95	1.76
dagger	43	4.91	1.72		41	4.63	1.92
dandelion	41	5.95	1.9		41	4.31	1.93
decoration	41	5.39	1.67		41	3.95	2.01
dial	43	3.6	1.87		41	4.48	1.88
diner	43	4.79	1.71		41	4.02	1.62
dishwasher	41	6.12	1.32		41	4.39	1.84
dollar	42	5.29	1.61		40	4.65	2.03
doorknob	41	6.12	1.52		41	5.17	1.82
doorway	41	5	1.73		41	3.61	1.72
eggplant	43	4.74	1.83		41	5.07	1.75
elevator	42	5.28	1.6		40	4.18	1.47
envelope	43	5.58	1.43		41	4.17	1.97
escalator	41	6.31	1.17		41	4.12	1.83
essay	43	4.26	1.94		40	3.75	1.81
exam	43	4.86	1.97		41	3.83	2.05
fiddle	41	5.15	1.85		41	4.78	1.85
fireplace	42	5.55	1.6		40	4	1.79
firewood	43	5.49	1.4		41	4.19	1.91
folder	43	4.81	2.01		41	4.68	1.98
football	43	5.47	1.72		41	5.73	1.36
freezer	42	4.88	1.93		41	4.31	2.12
furnace	41	5.66	1.74		41	3.41	1.9
furniture	41	5.95	1.66		41	4.66	1.76
garage	41	5.19	1.77		41	3.58	1.6
garbage	43	5.19	1.69		41	4.07	1.93
garden	43	5.7	1.32		41	5.22	1.56
garlic	43	5.42	1.65		41	4.98	1.88
grapefruit	41	6.37	1.34		41	5.17	1.7
grater	41	5.51	2.21		41	4.39	1.86
grenade	41	6.09	1.51		41	3.58	2.05
guitar	42	5.64	1.41		41	5.63	1.24
harmonica	41	6.08	1.69		41	4.93	1.9
harness	41	5.07	1.89		41	4.43	1.82
harpoon	41	4.8	2.35		40	4.1	2.01
harpsichord	41	3.17	2.26		41	3.78	1.86
hatchet	41	5.15	2.15		41	4.54	1.92
highway	41	5.45	1.42		41	3.31	1.78
honeydew	41	5.46	1.9		40	4.6	1.71
hotel	42	5.41	1.69		41	4.49	1.52
hurdle	41	4.85	2.06		41	3.61	1.8
instrument	41	5.66	1.68		41	5.29	1.52
insult	43	2.26	1.56		41	2.37	1.77
invitation	41	4.85	2.19		41	2.93	1.77
jersey	41	4.81	1.85		41	4.56	1.96
journal	43	4.91	1.59		41	4.88	1.86
kettle	41	6.22	1.31		41	4.61	1.87
lantern	41	5.9	1.66		41	4.27	1.9
laundry	43	5.12	1.65		41	5.07	1.6
leaflet	41	4.46	2.41		41	3.78	1.94
lemonade	43	5.53	1.47		41	5.27	1.53
level	43	3.02	1.78		41	2.8	2.03
lever	41	3.43	1.81		41	4.22	1.97
limousine	43	5.86	1.21		41	3.98	1.78
lotion	43	4.93	1.68		41	5.48	1.75
machete	40	5.25	2.18		40	4.38	2.06
magazine	43	5.32	1.71		41	5.27	1.76
mallet	41	4.9	2.26		40	4.56	1.97
mandarin	41	5.8	1.9		41	4.8	1.98
manor	41	4.31	2.47		41	2.88	1.6
mansion	40	6.45	0.03		41	3.15	1.7
mantle	43	4.35	1.82		41	3.56	1.79
marble	41	6.17	1.05		41	3.66	2.24
meadow	41	5.56	1.88		41	3.44	1.45
medicine	43	4.86	1.58		40	4.8	1.62
menu	43	5.02	1.77		41	4.51	2.01
metal	42	4.24	1.86		41	4.51	1.96
microscope	41	6.22	1.37		41	4.75	1.82
microwave	41	6.24	1.48		41	4.78	1.62
millstone	41	3.14	2.48		41	3.68	1.9
minute	43	2.4	1.38		41	1.95	1.58
missile	40	5.6	1.79		41	3.15	1.77
mittens	41	6.39	1.22		41	5.43	1.52
moisture	41	4.19	1.96		41	3.46	1.83
molasses	41	5.1	2.12		41	4.58	1.67
molecule	41	5.24	1.64		41	2.76	1.96
money	42	5.36	1.59		40	5.1	1.81
monument	41	5.15	1.88		40	3.03	1.78
morphine	43	3.49	2.03		40	4.23	2.15
mortar	41	3.29	2.21		41	3.68	1.78
mouthpiece	41	5.7	1.82		41	5.15	1.74
movie	43	4.84	1.78		41	3.1	1.76
muffin	43	5.63	1.31		41	5.56	1.72
mural	43	4.42	1.68		41	3.24	1.55
mustard	43	5.44	1.58		41	4.98	1.7
muzzle	43	4.56	1.58		41	3.88	1.82
napkin	43	5.23	1.81		41	5.39	1.74
nature	43	5.05	1.4		41	5.44	1.63
navy	43	4.79	1.58		41	2.56	1.76
nectarine	41	5.9	1.93		41	4.93	1.93
newspaper	43	5.23	1.81		41	5.34	1.88
nightgown	41	6.14	1.42		41	4.8	1.76
nipple	43	5.44	1.33		40	5.38	1.61
novel	43	4.93	1.82		41	4.07	1.71
nozzle	43	3.98	1.82		41	4.15	1.9
number	43	4.19	2.05		41	2.73	2.09
nursery	42	4.62	1.86		41	3.7	1.86
nutmeg	41	4.8	2.59		41	4.63	1.81
oatmeal	43	5.14	1.75		41	4.98	1.85
ocean	43	5.79	1.58		41	5.07	1.62
office	43	4.63	1.62		40	4.42	1.95
onion	43	5.28	1.76		41	5.12	1.66
opium	41	3.51	2.2		41	4.46	1.62
orchard	43	4.77	1.74		41	4.05	1.59
orchestra	41	5.9	1.51		41	3.24	1.79
ornament	41	5.68	1.66		41	4.07	2.08
outfit	43	4.58	1.72		41	5.02	1.82
outhouse	41	5.05	2.17		41	3.83	1.87
oven	43	5.42	1.61		41	4.78	2.03
packet	43	3.51	1.71		41	3.84	1.92
padlock	41	5.07	2.18		41	4.46	1.91
painting	43	5.26	1.63		41	3.9	1.61
pajamas	41	6.51	1.12		41	5	1.7
palace	41	6.51	1.03		41	3.19	1.65
parade	43	5.14	1.42		41	3.53	1.75
parcel	43	4.79	1.82		41	4.36	1.89
parka	41	5.51	1.94		40	4.85	1.81
parsley	41	5.44	2.07		41	4.92	1.81
party	42	5.19	1.59		41	4.39	2.14
passport	41	5.97	1.59		41	4.46	1.94
pebble	41	6.17	1.28		41	4.04	2.06
pedal	43	4.88	1.84		41	4.63	1.93
pendulum	41	5.43	1.88		41	3.32	1.81
pepper	43	5.26	1.54		41	5.14	1.62
photograph	41	6.24	1.2		41	4.39	1.58
pickle	43	5.63	1.63		41	5.19	1.69
pistol	43	5.14	1.63		40	4.7	2.16
piston	41	4.51	2.29		41	3.37	1.96
planet	43	5.53	1.4		41	3.88	1.98
platform	43	4.34	2.05		41	3.31	1.52
platter	41	5.37	1.92		41	4.17	1.97
pliers	41	5.51	2.16		41	4.36	2.06
pocket	42	4.59	1.74		41	4.95	2.09
podium	41	5.63	1.83		41	3.44	1.72
poison	43	4.16	1.65		41	3.6	2.12
poker	43	5.12	1.73		40	3.98	1.85
pollen	43	4.3	1.91		41	3.61	1.74
pollution	41	4.92	1.81		41	2.63	1.67
portrait	41	6.05	1.53		41	3.29	1.72
poster	42	4.86	1.7		41	4.07	1.71
powder	43	4.63	1.68		41	4.41	1.79
prairie	41	5.83	1.69		41	2.83	1.66
pretzel	43	5.56	1.58		40	5.18	1.63
prison	43	5.3	1.34		41	3.51	1.73
profile	43	3.05	1.8		41	2.39	1.73
projectile	41	4.8	2.22		41	3.12	1.94
projector	40	5.48	1.92		41	4.02	1.92
propeller	41	5.56	1.76		41	3.17	1.69
property	43	3.32	1.7		41	4.17	1.86
puddle	41	6.12	1.52		39	4.13	1.82
quarter	43	5.26	1.69		41	4.53	2
racquet	41	5.82	1.74		40	4.83	1.68
raisin	41	6.22	1.4		40	5.1	1.71
raspberry	41	6.39	1.45		41	5.27	1.75
rattle	43	4.16	1.99		41	4.63	1.91
recital	41	4.11	1.96		41	2.76	1.68
rectangle	41	6.41	1.13		40	2.33	1.73
restaurant	43	5.09	1.41		41	4.78	1.6
revolver	41	5.54	2.05		41	4.29	1.97
rhubarb	41	5.31	2.29		41	4.65	1.83
ribbon	41	6.24	1.43		41	4.39	1.67
riddle	43	2.44	1.69		41	2.07	1.56
rifle	43	4.93	1.74		41	4.46	2.02
ritual	43	3.14	1.55		41	3.12	1.89
river	43	5.56	1.33		41	4.77	1.53
rocker	41	4.31	1.88		41	4.05	2.02
rubber	43	4.21	2.1		41	3.88	1.92
rubble	41	4.66	2.22		41	3.02	1.81
rudder	41	3.63	2.4		41	3.51	1.79
rumble	40	2.75	1.88		41	2.22	1.6
salad	43	5.41	1.68		41	5.27	1.5
saloon	40	5.18	2.24		41	3.02	1.47
sandals	43	5.58	1.53		41	5.25	1.61
sandpaper	41	5.7	1.82		40	4.4	1.86
satchel	41	5.02	2.29		41	4.24	1.88
satin	41	4.58	1.99		41	4.07	1.93
saucer	43	4.14	1.93		41	4.39	1.88
sausage	43	5.14	1.81		41	5.31	1.56
scalpel	41	5.58	2.01		41	4.53	1.83
scooter	43	5.19	1.64		41	5.12	1.66
seaweed	41	5.85	1.93		41	4.37	1.89
sewer	43	4.35	1.96		41	3.02	1.89
shelter	43	4.67	1.66		41	3.88	1.79
shotgun	43	4.98	1.55		41	4.39	2.01
shutter	41	4.63	2.01		41	3.22	1.93
silver	42	4.42	1.94		41	3.51	1.86
siren	40	5.7	1.77		41	2.54	1.64
skillet	41	5.37	2.05		41	4.58	1.82
skyscraper	41	5.83	1.69		41	3.15	1.62
sledgehammer	41	5.64	2.11		41	4.63	1.84
slingshot	43	5.32	1.34		41	4.44	1.82
soda	43	5.28	1.68		41	5.17	1.82
sofa	41	5.66	1.3		41	5.27	1.79
spinach	43	5.32	1.64		41	5.15	1.8
stadium	43	5.21	1.46		41	3.66	1.74
station	42	4.21	1.94		41	3.12	1.65
steeple	41	4.17	2.48		40	2.91	1.48
stereo	41	6.26	1.25		40	4.85	1.75
story	43	3.02	1.7		39	2.56	1.73
strainer	41	5.78	1.75		41	4.56	1.95
streamer	41	4.34	2.1		41	4.14	1.93
suburb	41	5	1.99		41	2.44	1.47
subway	43	5.49	1.45		41	4.07	1.62
sugar	43	4.93	1.86		41	5	1.85
summit	43	4.26	1.8		41	3.2	1.64
supper	43	4.88	1.76		41	5.02	1.54
surface	43	3.53	1.71		41	4.27	2.25
surfboard	41	6.17	1.34		40	4.82	2.01
swimsuit	41	6.54	1.12		41	5.07	1.68
syringe	41	6.02	1.72		41	4.63	1.74
syrup	43	5.19	1.8		41	4.5	1.67
tangerine	41	5.68	1.91		41	5.19	1.68
taxi	42	5.83	1.3		41	4.78	1.78
tempest	43	2.54	2.05		41	2.54	1.72
temple	43	4.3	1.89		41	3.56	1.38
theatre	41	5.21	1.64		41	3.95	1.66
thermometer	41	6.17	1.48		41	4.1	1.97
thicket	41	3.56	2.28		41	3.37	1.7
thistle	40	4.18	2.17		41	3.68	2.04
thunder	41	4.68	2.24		41	2	1.34
ticket	43	5.3	1.5		41	3.95	2.07
tickle	43	4.28	1.94		41	4.19	2.27
timber	40	4.63	2.14		41	3.66	1.87
tinsel	41	5.14	2.08		41	4.1	1.91
tissue	43	5.12	1.65		40	5.15	1.9
tobacco	43	4.84	1.6		41	4.85	1.77
tomahawk	41	3.39	2.44		41	3.39	1.87
tornado	43	5.74	1.48		40	2.76	1.85
tower	43	5.19	1.8		41	3.29	1.62
traffic	43	5.28	1.45		41	3.46	2.07
trailer	43	4.95	1.62		40	4.05	1.78
tricycle	41	6.29	1.21		41	5.02	1.78
trinket	41	4.1	2.25		41	3.88	1.95
trolley	41	5.41	1.87		40	3.9	1.9
trombone	41	5.85	1.85		40	5.08	1.89
trousers	41	5.61	1.9		41	5.39	1.61
tuba	43	5.07	1.87		41	4.76	1.79
tulip	43	5.62	1.31		41	4.27	1.83
tunnel	43	5.28	1.4		41	3.24	1.53
turban	41	6.02	1.6		41	4.12	2.04
turnip	41	5.63	1.93		41	5.1	1.81
turpentine	40	3.45	2.53		41	3.22	1.64
uniform	43	4.79	1.8		41	5.07	1.62
upholstery	41	4.2	2.28		41	3.85	1.94
vehicle	43	5.42	1.72		40	5.43	1.41
village	43	4.63	1.85		41	3.73	1.64
warehouse	41	5.58	1.86		40	3.23	1.76
weapon	43	4.49	1.72		41	4.39	1.84
zucchini	41	5.92	1.82		41	4.93	1.86
